# Supplementary material for: Fatty Acid and Amino Acid Profile of 7 Edible Insects: Focus on Lipid Class Composition and Protein Conversion Factors
Source: Preprints.org preprint supplement (doi:10.20944/preprints202310.1155.v2), 2023-10-24
Supplement: Supplementary file 4 [file supplementary]

**ST1**. Proximate composition of edible insects, expressed as g / 100 g DM (mean ± SEM), except for moisture, which is expressed as g / 100 g insect.

|  | **ACD** | **ALD** | **BD** | **GM** | **LM** | **TM** | **ZM** |
| --- | --- | --- | --- | --- | --- | --- | --- |
| **Total lipids** | 21.32±0.36b | 21.82±0.30b | 13.96±0.45a | 53.63±0.80d | 32.28±0.43c | 22.61±0.64b | 33.97±0.82c |
| ***Neutral lipids*** | 9.94±0.33ab | 10.32±0.39ab | 7.91±0.53a | 46.22±0.88d | 24.44±0.55c | 10.79±0.68b | 22.18±0.98c |
| ***Glycolipids*** | 5.85±0.18b | 8.32±0.54c | 2.64±0.22a | 5.97±0.32b | 3.08±0.31a | 9.58±0.54cd | 10.61±0.78d |
| ***Phospholipids*** | 5.54±0.29c | 3.18±0.41b | 3.40±0.39b | 1.43±0.12a | 4.76±0.22c | 2.23±0.28ab | 1.17±0.28a |
| **True protein** | 39.37±0.10c | 55.74±0.21e | 61.49±0.27f | 28.69±0.53a | 44.23±0.59d | 44.68±0.74d | 34.57±0.20b |
| **Moisture** | 68.51±0.13d | 72.5 ±0.06e | 64.10±0.72c | 56.21±1.77a | 62.45±0.15bc | 63.00±0.17bc | 61.37±0.06b |

a-d Mean values in the same row not followed by a common letter differ significantly (*p* < 0.001).

ACD: *A. domesticus;* ALD: *A. diaperinus;* BD: *B. dubia*; GM: *G. mellonella;* LM: *L. migratoria;* TM: *T. molitor;* ZM: *Z. morio;*
